# Supplementary material for: Lignan Glycosides from Urena lobata
Source: MDPI journal article supplement (doi:10.3390/molecules24152850), 2019-08-06
Supplement: s1 [file s1]

## ***Supporting Information***

### Lignan Glycosides from *Urena lobata*

Yuan Luo<sup>1</sup>, Cong Su<sup>1</sup>, Ning Ding<sup>1</sup>, Bowen Qi<sup>1</sup>, Fangfang Jia<sup>1</sup>, Xiping Xu<sup>1</sup>, Xiao Liu<sup>1</sup>,  
Juan Wang<sup>1</sup>, Xiaohui Wang<sup>1</sup>, Pengfei Tu<sup>1</sup> and Shepo Shi<sup>1, 2, \*</sup>

<sup>1</sup> Modern Research Center for Traditional Chinese Medicine, Beijing University of  
Chinese Medicine, Beijing 100029, People's Republic of China

<sup>2</sup> Beijing Key Lab for Quality Evaluation of Chinese Meteria Medica, Beijing  
University of Chinese Medicine, Beijing 100029, China.

\* Correspondence: shishepo@163.com (S.-P.S.); Tel./Fax.: +86-010-6428-6350

## The List of Contents

| No.        | Content                                                           |
|------------|-------------------------------------------------------------------|
| <b>S1</b>  | HRESIMS spectrum of compound <b>1</b>                             |
| <b>S2</b>  | <sup>1</sup> H NMR spectrum of compound <b>1</b>                  |
| <b>S3</b>  | <sup>13</sup> C NMR spectrum of compound <b>1</b>                 |
| <b>S4</b>  | <sup>1</sup> H- <sup>1</sup> H COSY spectrum of compound <b>1</b> |
| <b>S5</b>  | gHSQC spectrum of compound <b>1</b>                               |
| <b>S6</b>  | gHMBC spectrum of compound <b>1</b>                               |
| <b>S7</b>  | NOESY spectrum of compound <b>1</b>                               |
| <b>S8</b>  | CD spectrum of compound <b>1</b>                                  |
| <b>S9</b>  | HRESIMS spectrum of compound <b>2</b>                             |
| <b>S10</b> | <sup>1</sup> H NMR spectrum of compound <b>2</b>                  |
| <b>S11</b> | <sup>13</sup> C NMR spectrum of compound <b>2</b>                 |
| <b>S12</b> | <sup>1</sup> H- <sup>1</sup> H COSY spectrum of compound <b>2</b> |
| <b>S13</b> | gHSQC spectrum of compound <b>2</b>                               |
| <b>S14</b> | gHMBC spectrum of compound <b>2</b>                               |
| <b>S15</b> | NOESY spectrum of compound <b>2</b>                               |
| <b>S16</b> | CD spectrum of compound <b>2</b>                                  |
| <b>S17</b> | HRESIMS spectrum of compound <b>3</b>                             |
| <b>S18</b> | <sup>1</sup> H NMR spectrum of compound <b>3</b>                  |
| <b>S19</b> | <sup>13</sup> C NMR spectrum of compound <b>3</b>                 |
| <b>S20</b> | <sup>1</sup> H- <sup>1</sup> H COSY spectrum of compound <b>3</b> |
| <b>S21</b> | gHSQC spectrum of compound <b>3</b>                               |
| <b>S22</b> | gHMBC spectrum of compound <b>3</b>                               |
| <b>S23</b> | NOESY spectrum of compound <b>3</b>                               |
| <b>S24</b> | CD spectrum of compound <b>3</b>                                  |
| <b>S25</b> | HRESIMS spectrum of compound <b>4</b>                             |
| <b>S26</b> | <sup>1</sup> H NMR spectrum of compound <b>4</b>                  |
| <b>S27</b> | <sup>13</sup> C NMR spectrum of compound <b>4</b>                 |
| <b>S28</b> | <sup>1</sup> H- <sup>1</sup> H COSY spectrum of compound <b>4</b> |
| <b>S29</b> | gHSQC spectrum of compound <b>4</b>                               |
| <b>S30</b> | gHMBC spectrum of compound <b>4</b>                               |
| <b>S31</b> | NOESY spectrum of compound <b>4</b>                               |
| <b>S32</b> | CD spectrum of compound <b>4</b>                                  |

Event#: 5 MS(E-) Ret. Time : 9.728 Scan#: 1525

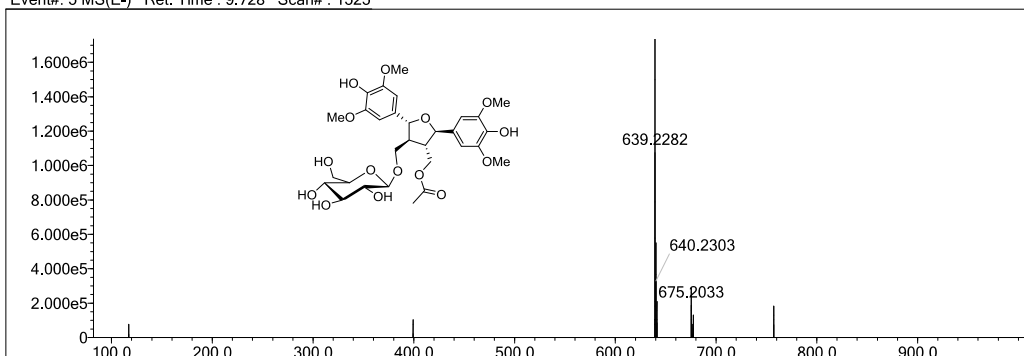

Measured region for 639.2282 m/z

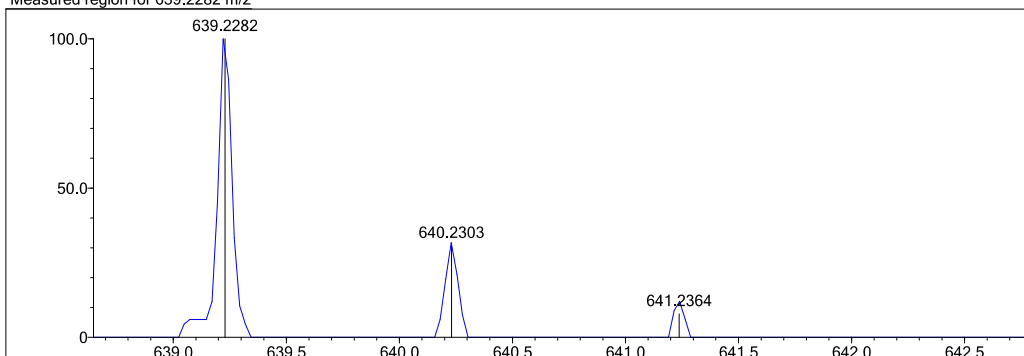

C30 H40 O15 [M-H]<sup>-</sup> : Predicted region for 639.2294 m/z

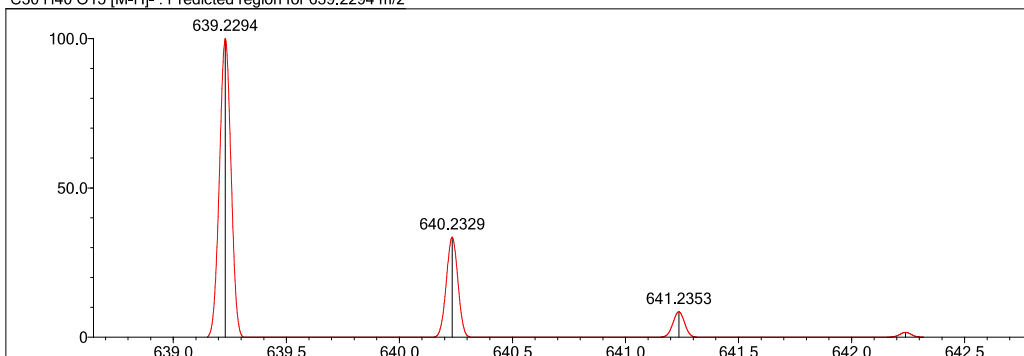

| Rank | Score | Formula (M) | Ion                | Meas. m/z | Pred. m/z | Df. (mDa) | Df. (ppm) | Iso   | DBE  |
|------|-------|-------------|--------------------|-----------|-----------|-----------|-----------|-------|------|
| 1    | 77.91 | C30 H40 O15 | [M-H] <sup>-</sup> | 639.2282  | 639.2294  | -1.2      | -1.88     | 79.67 | 11.0 |

## S1 HRESIMS spectrum of compound 1

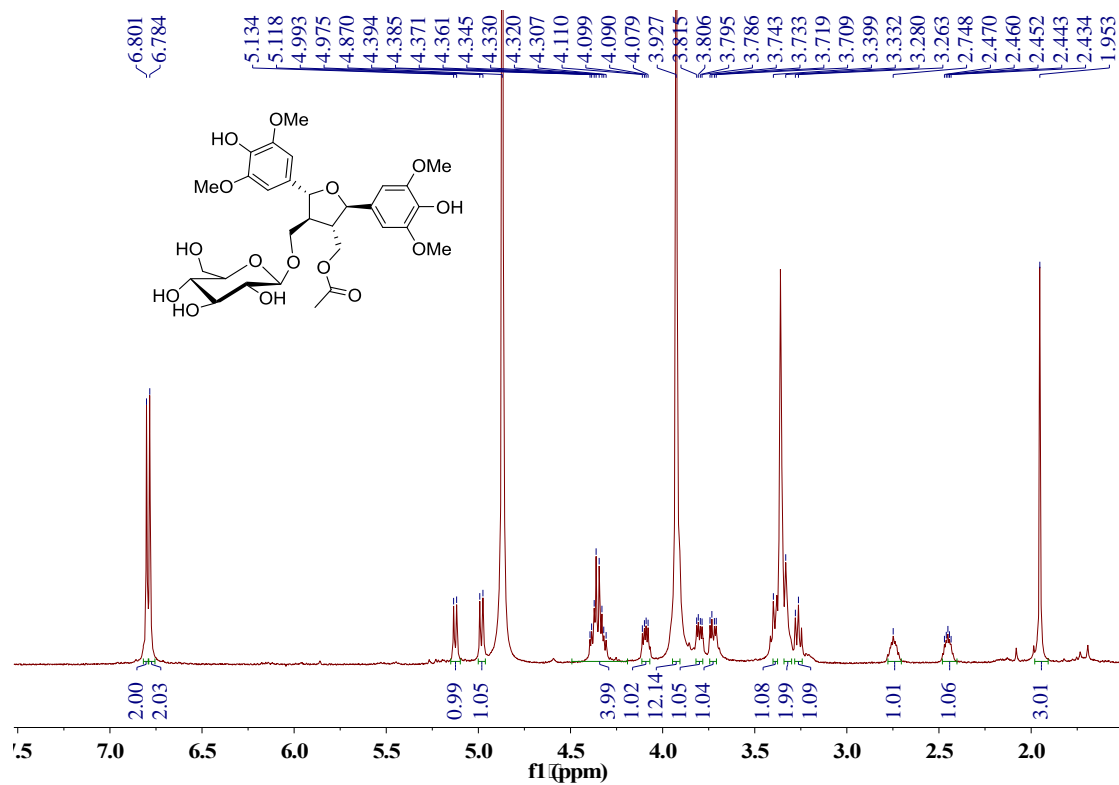

**S2  $^1\text{H}$  NMR spectrum of compound 1**

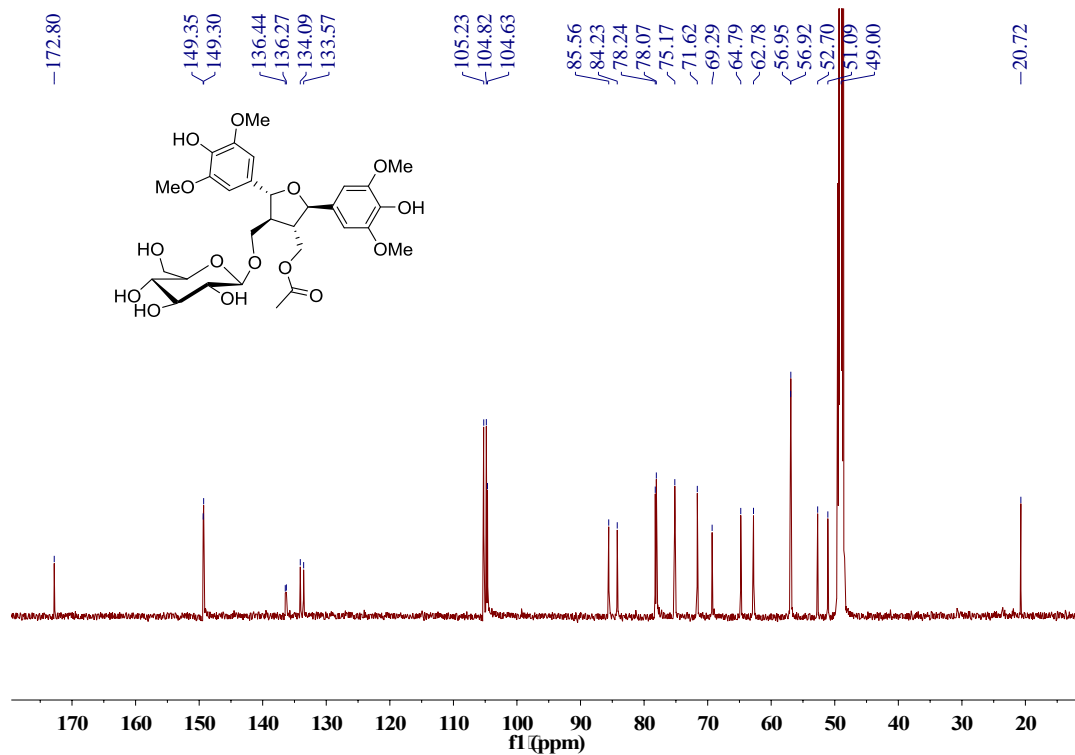

**S3  $^{13}\text{C}$  NMR spectrum of compound 1**

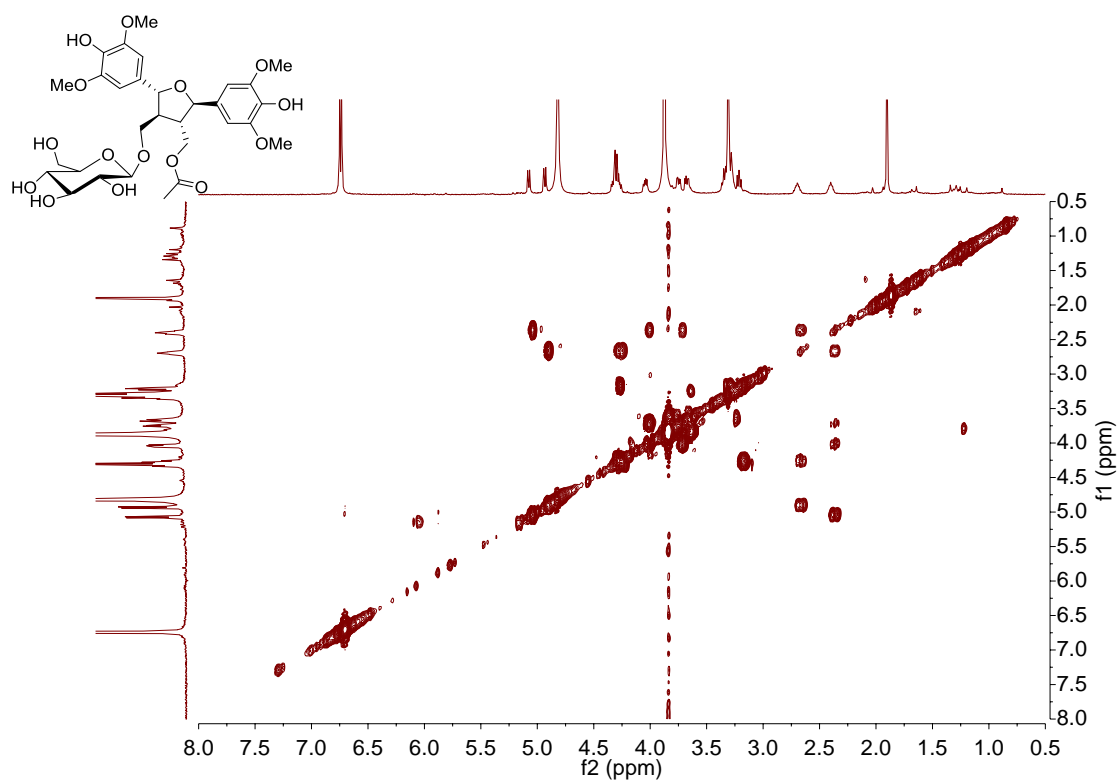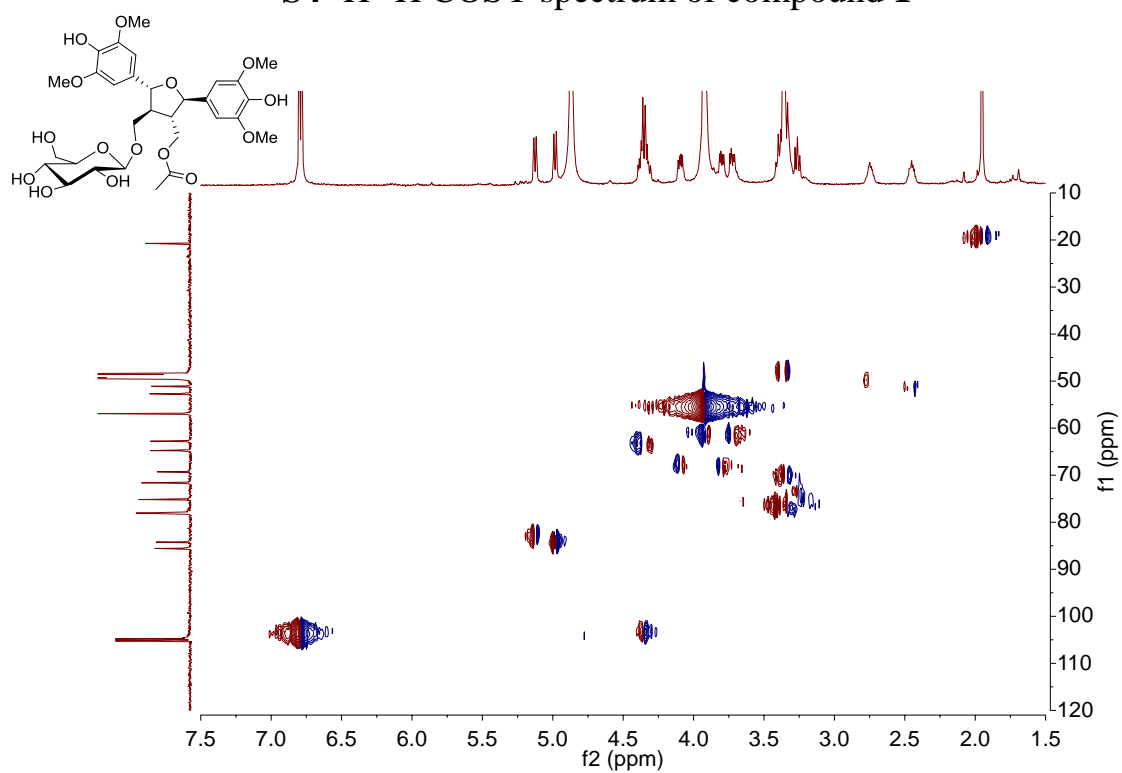

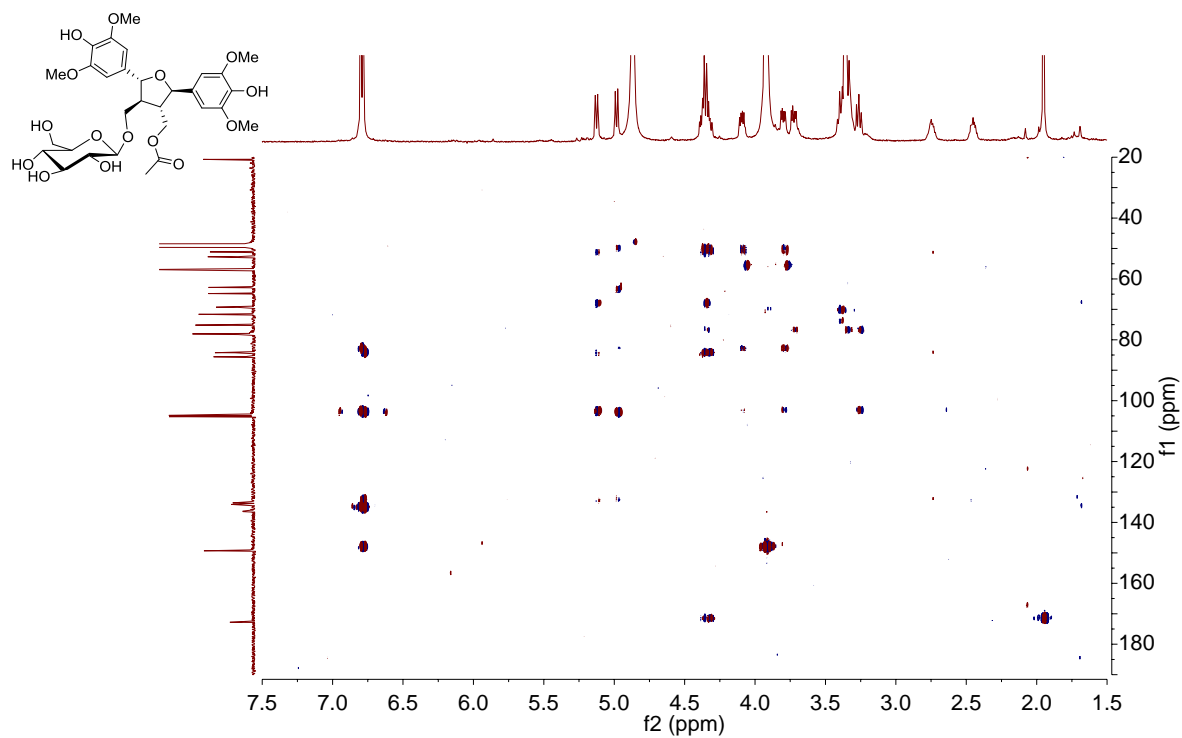

S6 gHMBC spectrum of compound 1

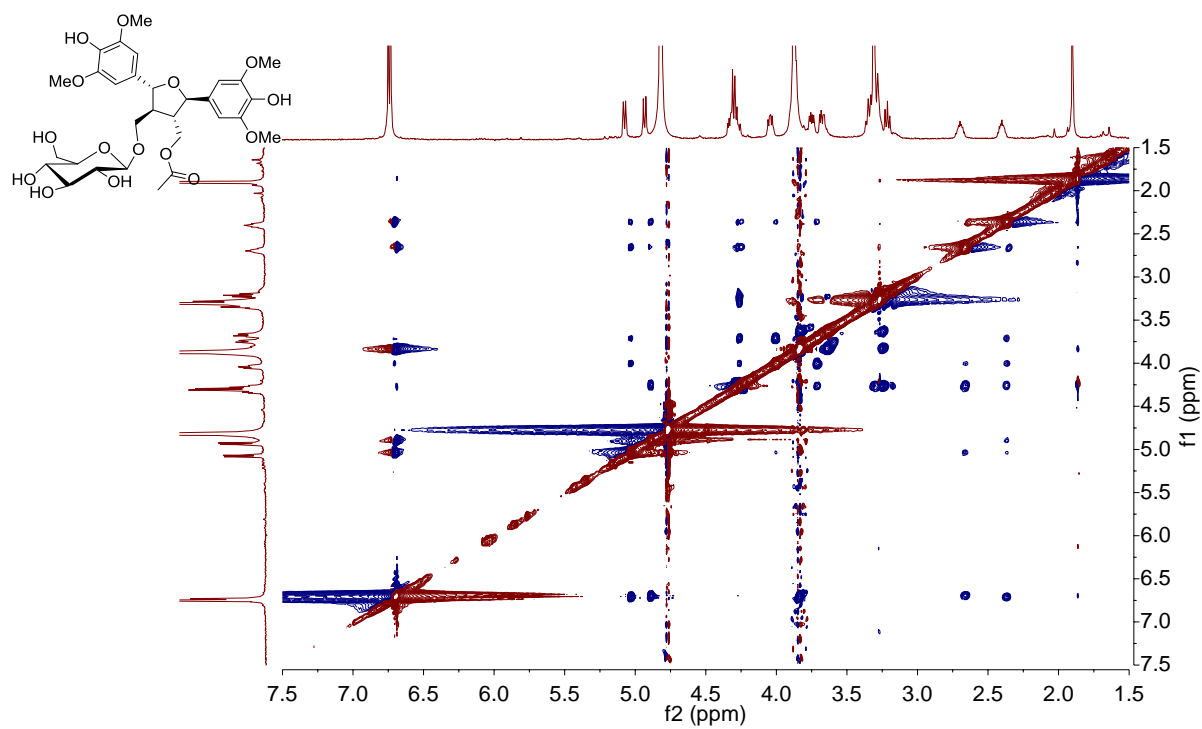

S7 NOESY spectrum of compound 1

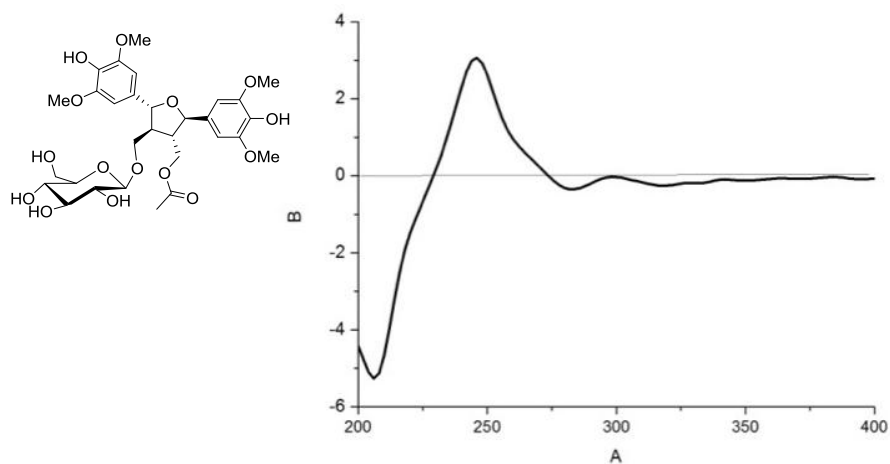

**S8 CD spectrum of compound 1**

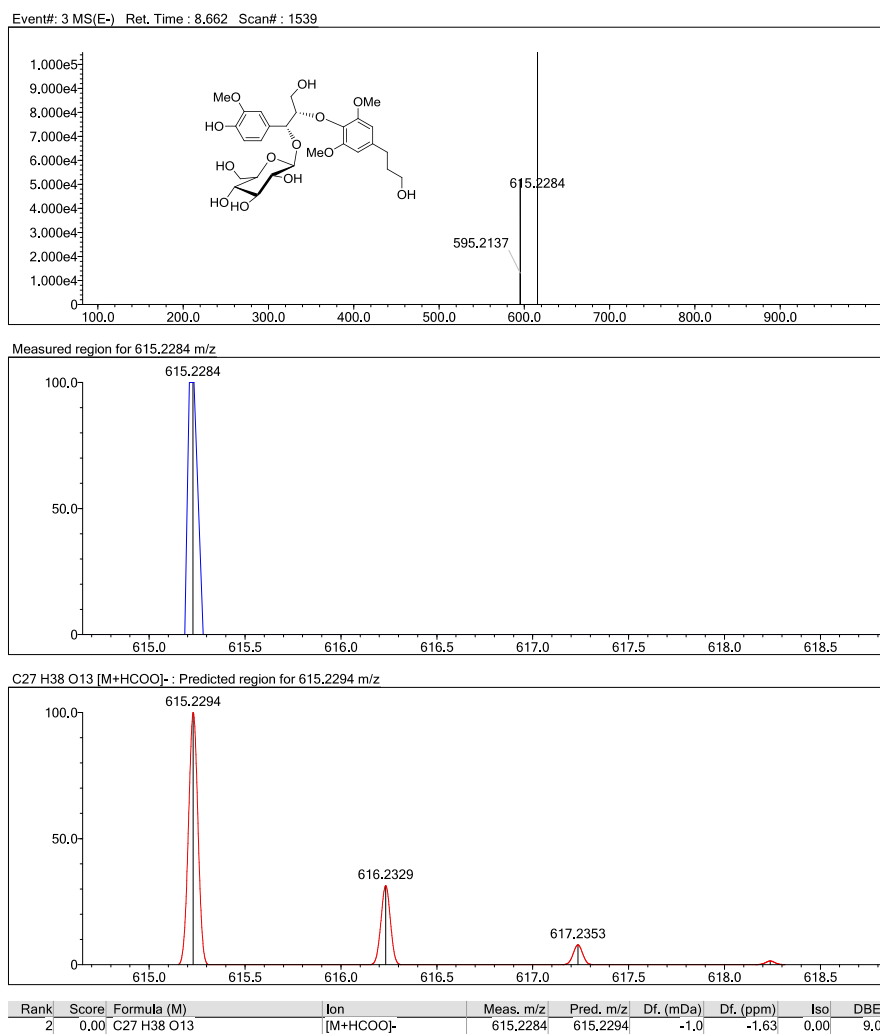

**S9 HRESIMS spectrum of compound 2**

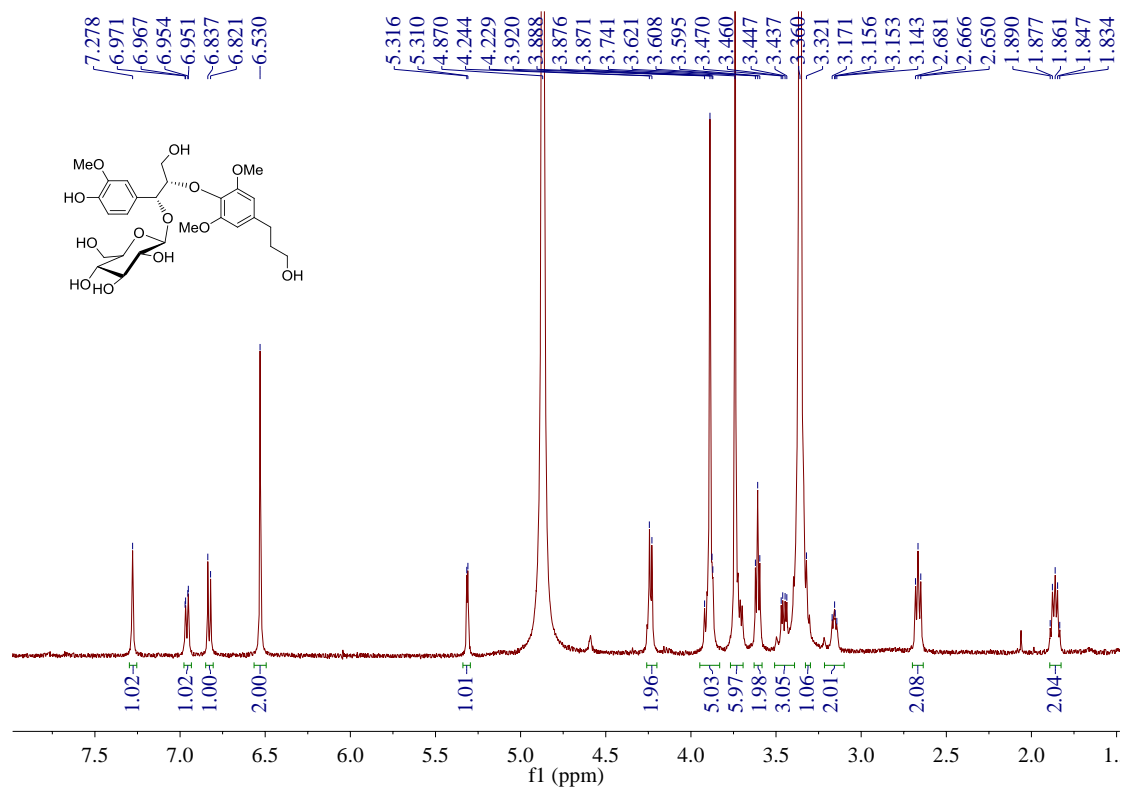

**S10** <sup>1</sup>H NMR spectrum of compound **2**

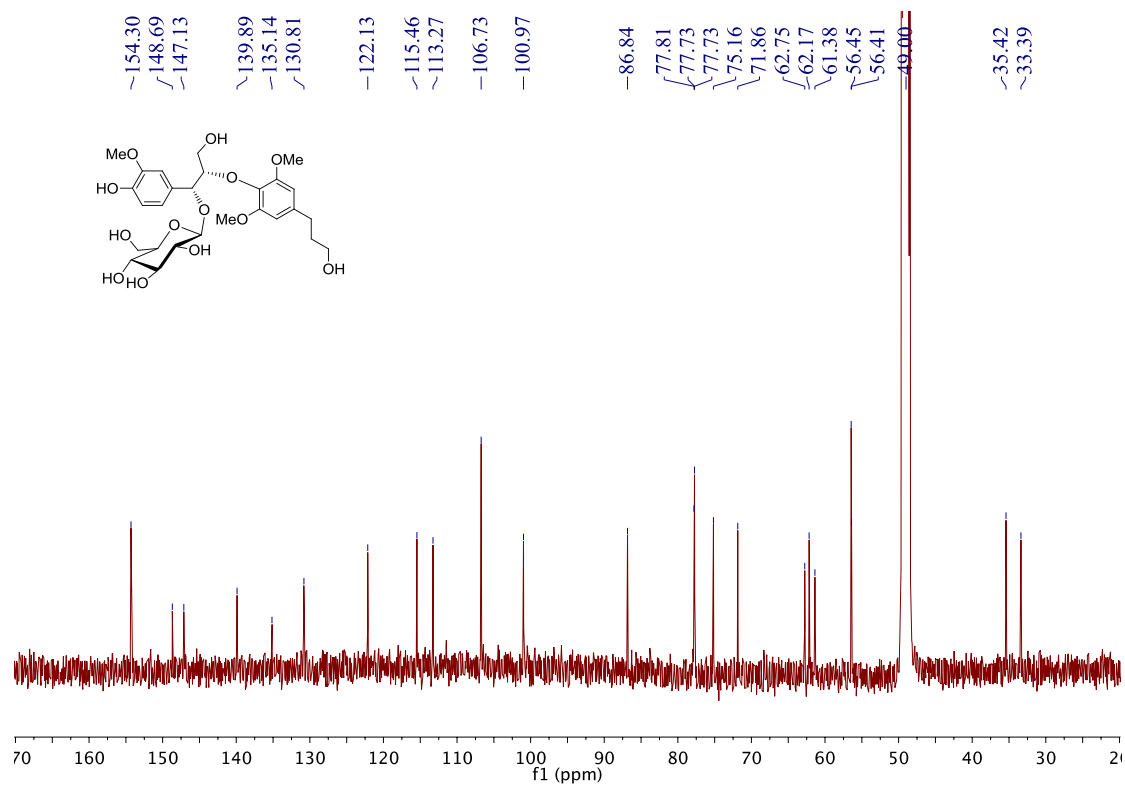

**S11** <sup>13</sup>C NMR spectrum of compound **2**



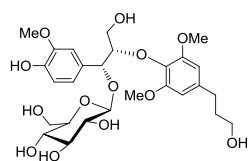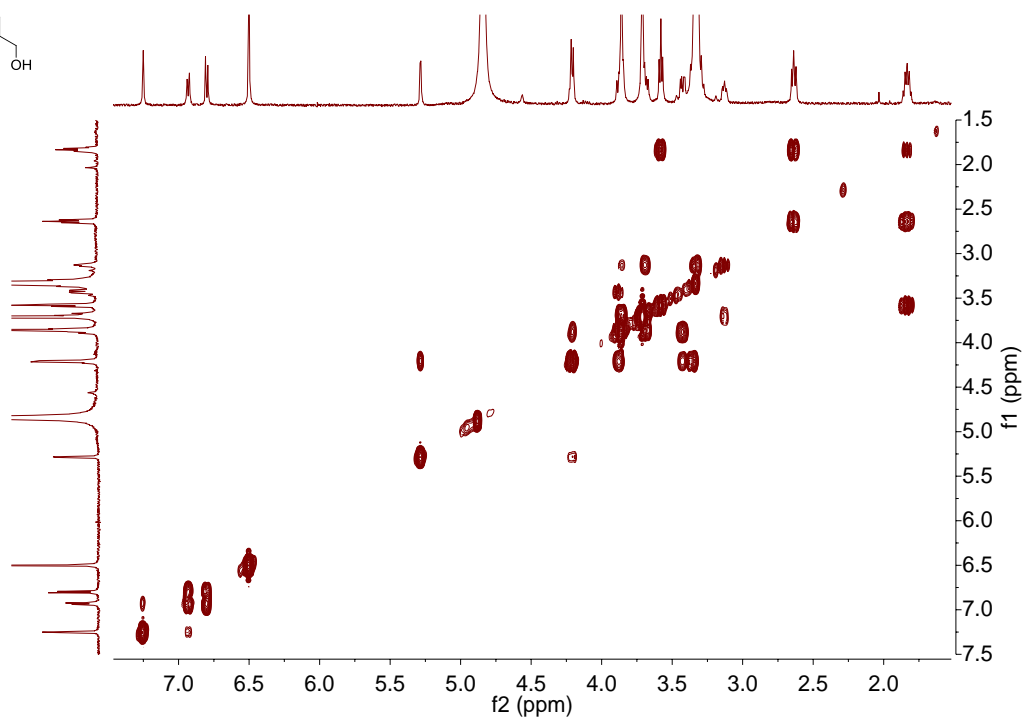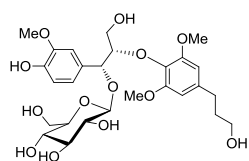

**S12**  $^1\text{H}$ - $^1\text{H}$  COSY spectrum of compound **2**

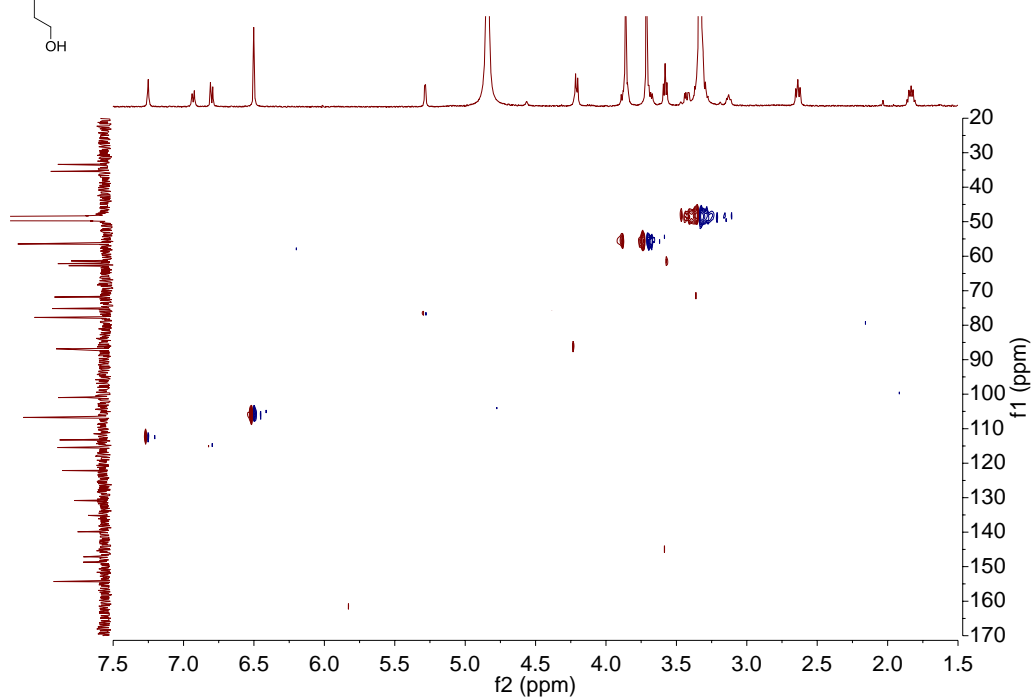

**S13** gHSQC spectrum of compound **2**

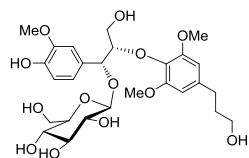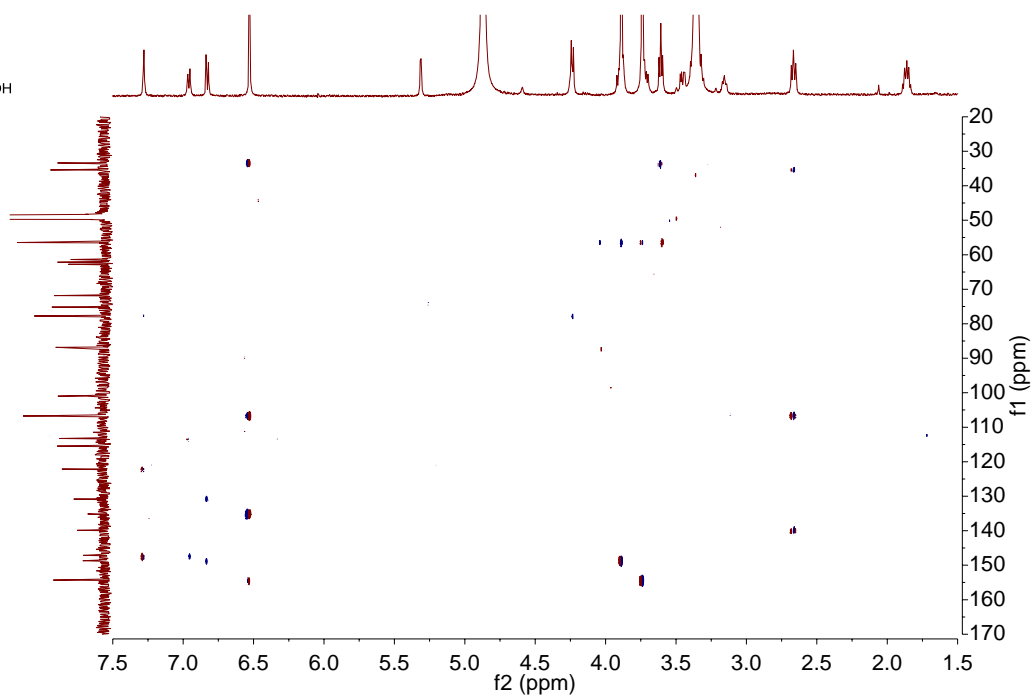

**S14** gHMBC spectrum of compound **2**

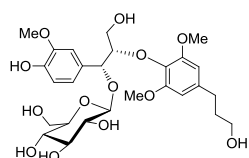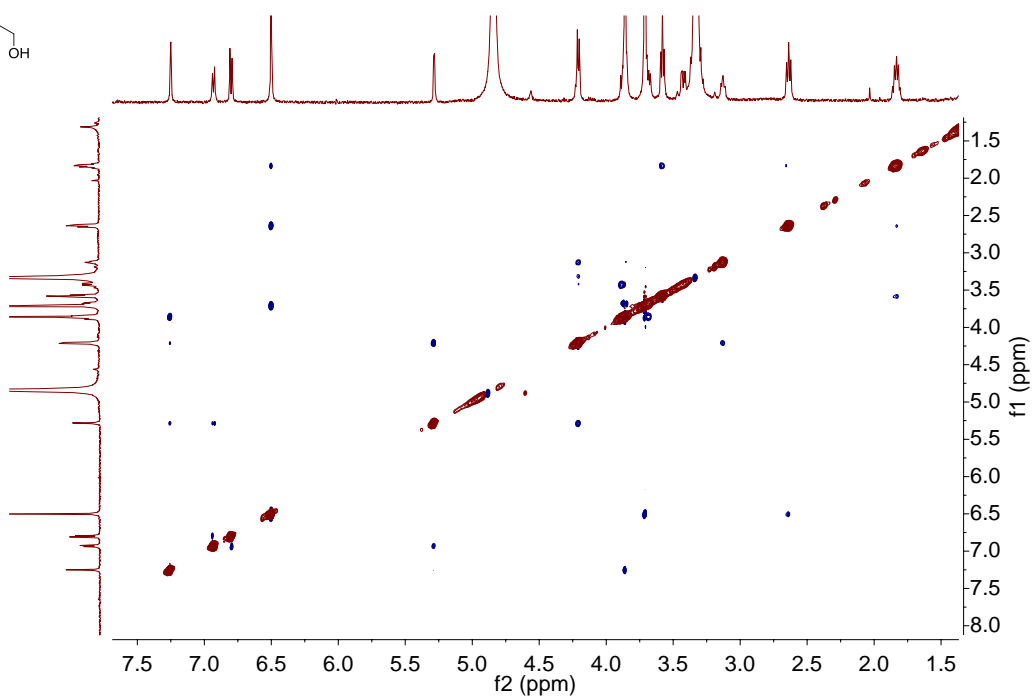

**S15** NOESY spectrum of compound **2**

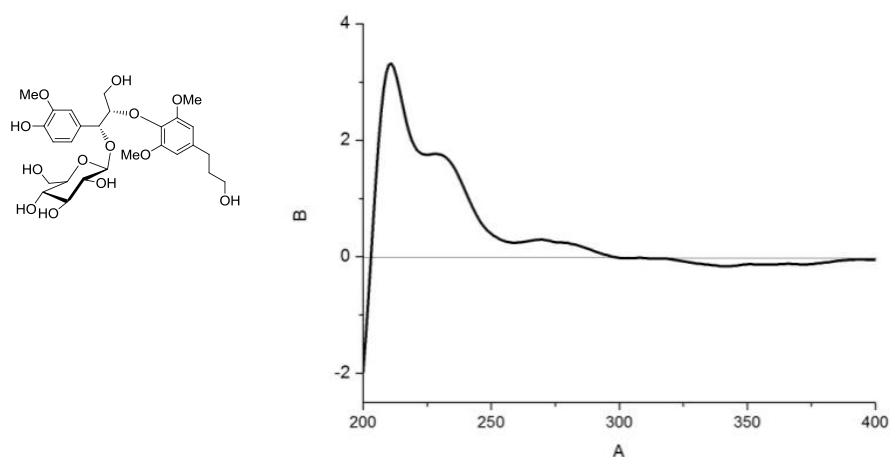

**S16 CD spectrum of compound 2**

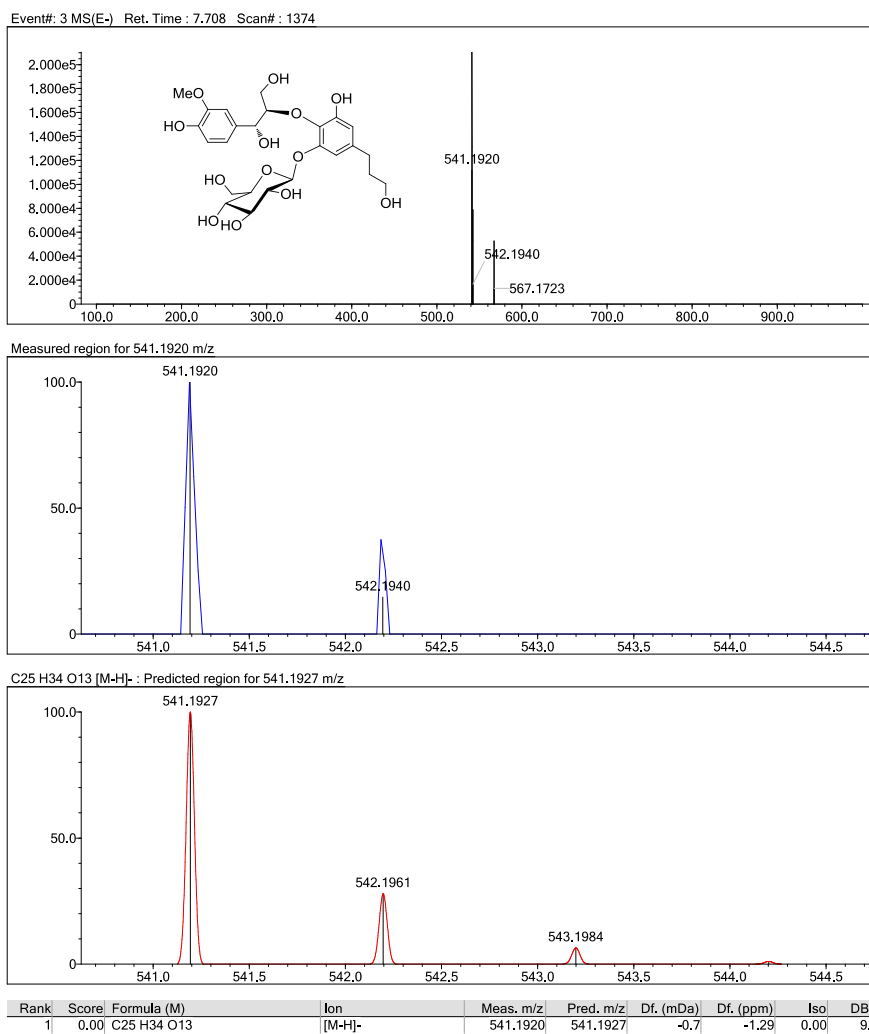

**S17 HRESIMS spectrum of compound 3**

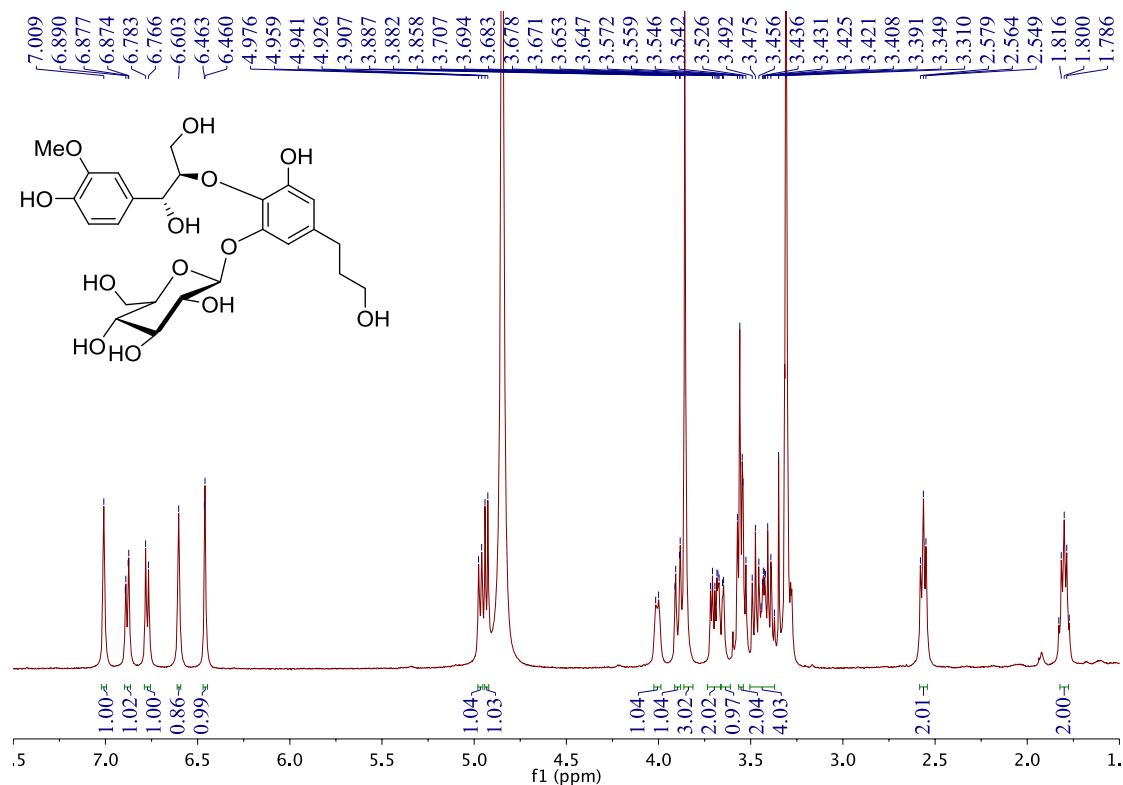

**S18** <sup>1</sup>H NMR spectrum of compound **3**

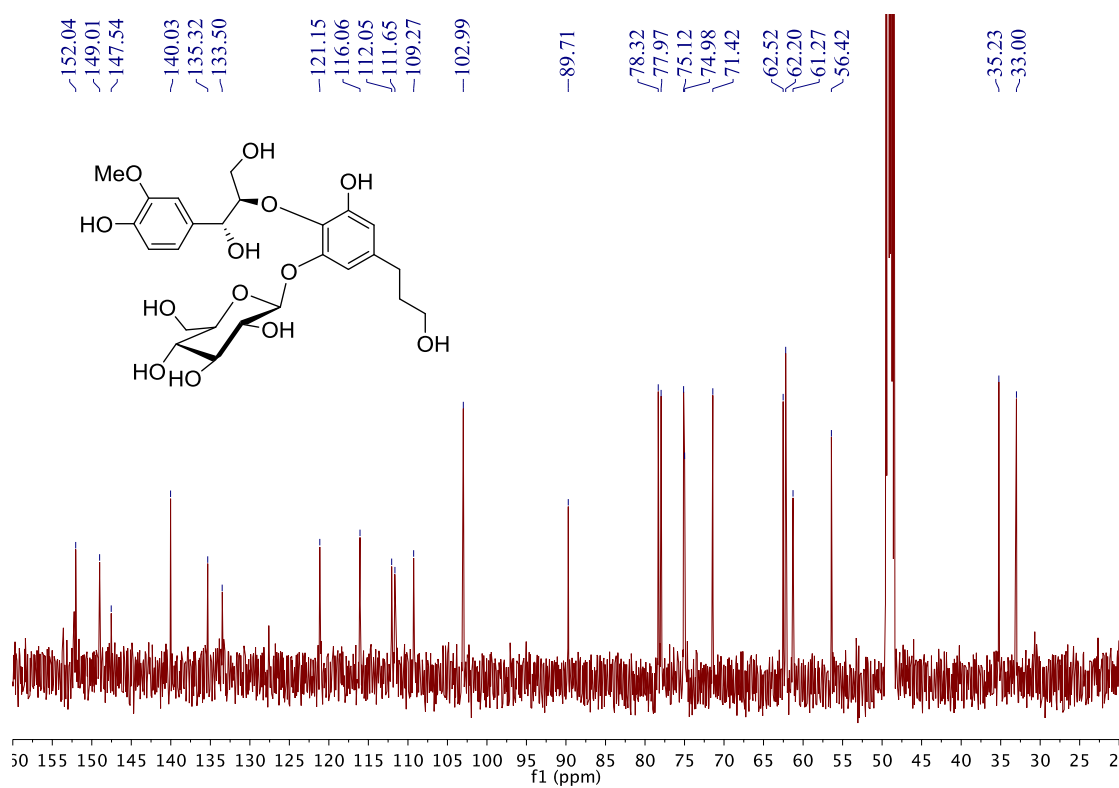

**S19** <sup>13</sup>C NMR spectrum of compound **3**

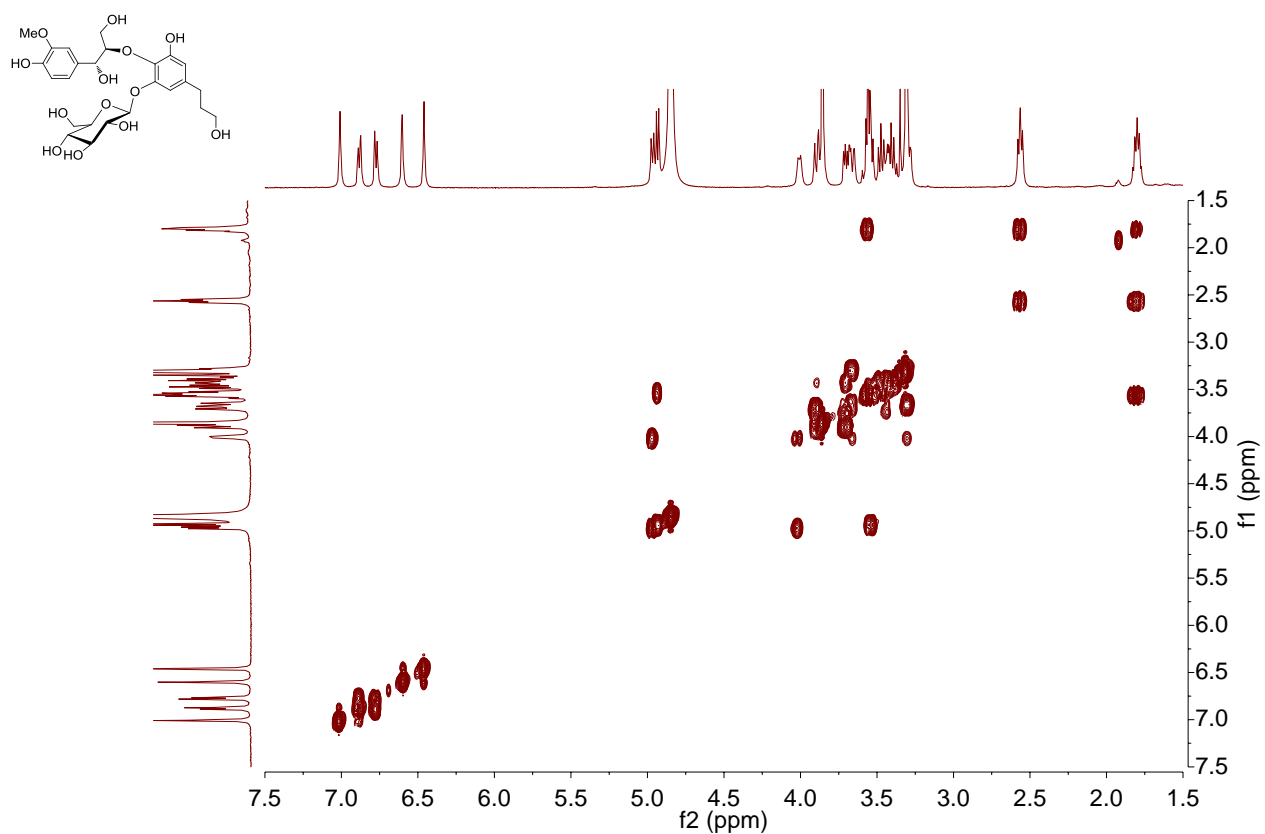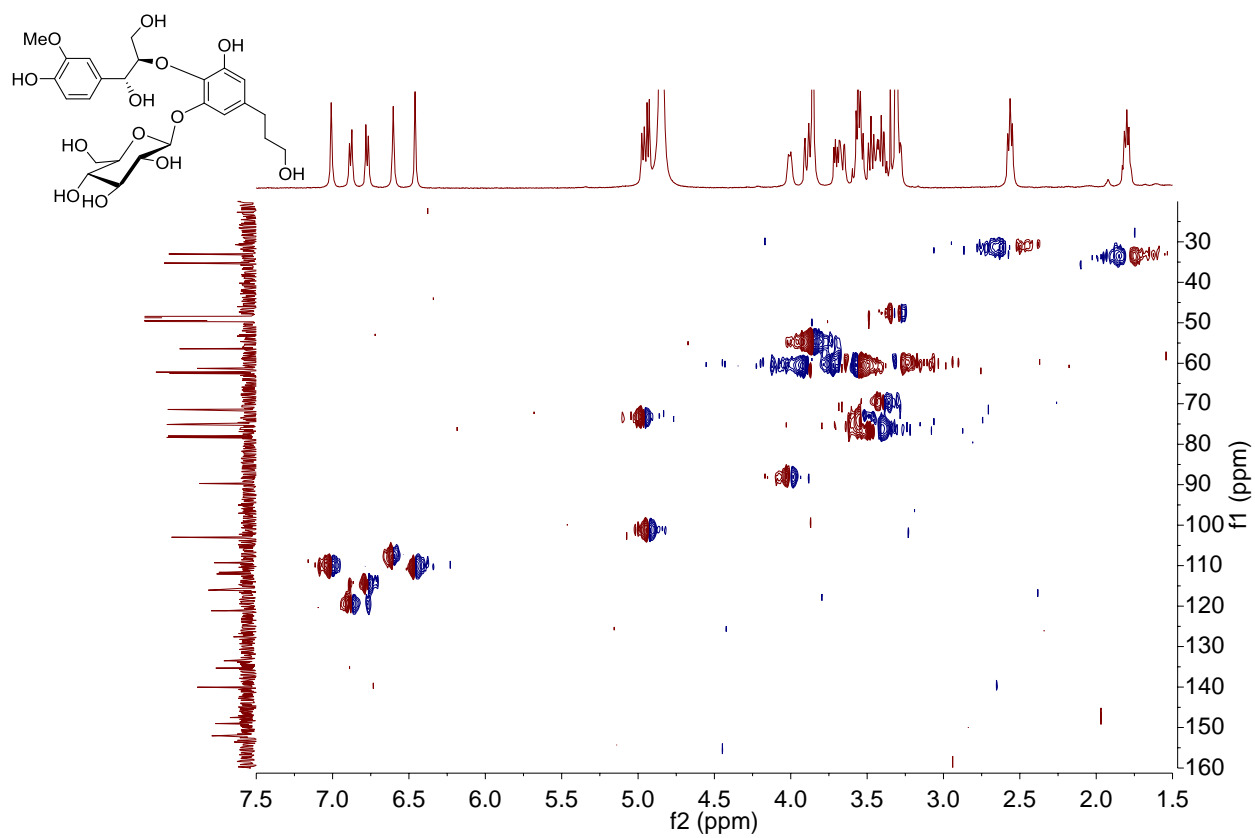

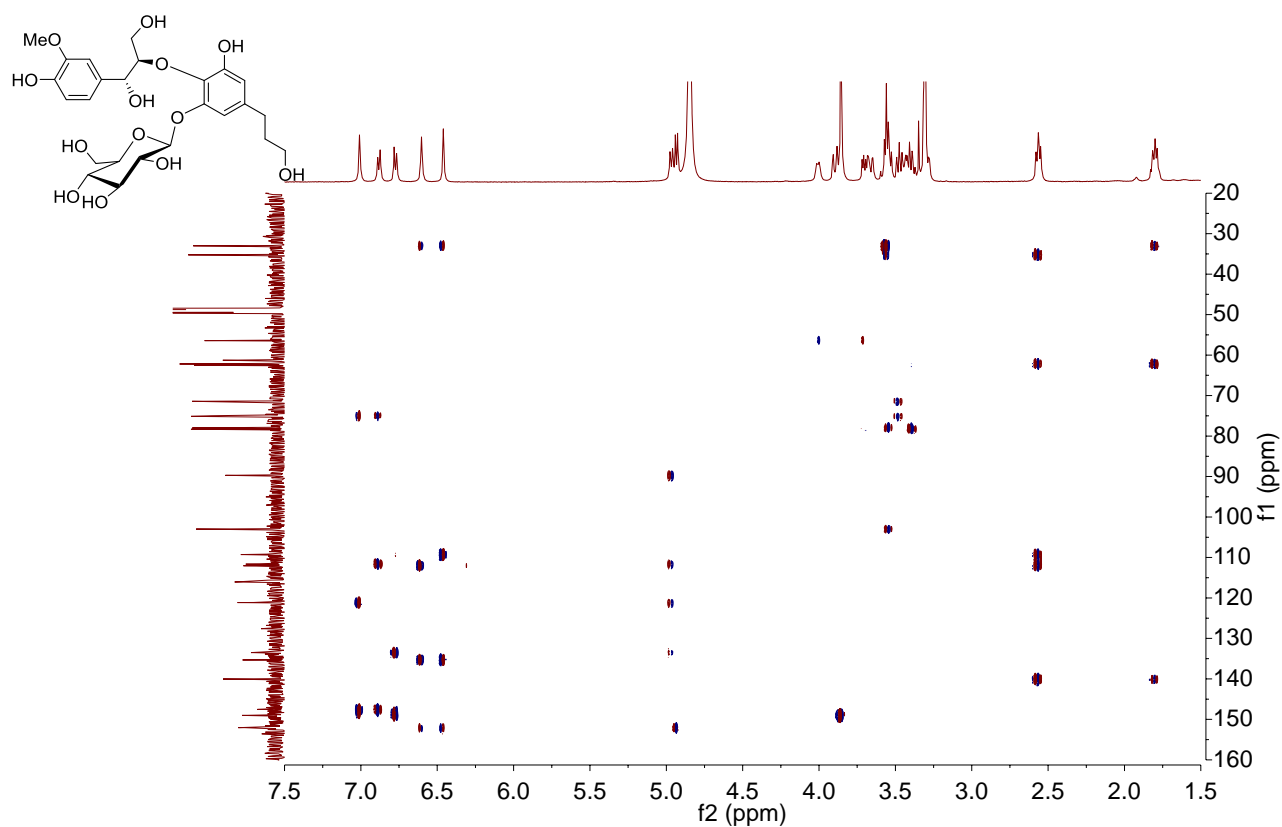

S22 gHMBC spectrum of compound 3

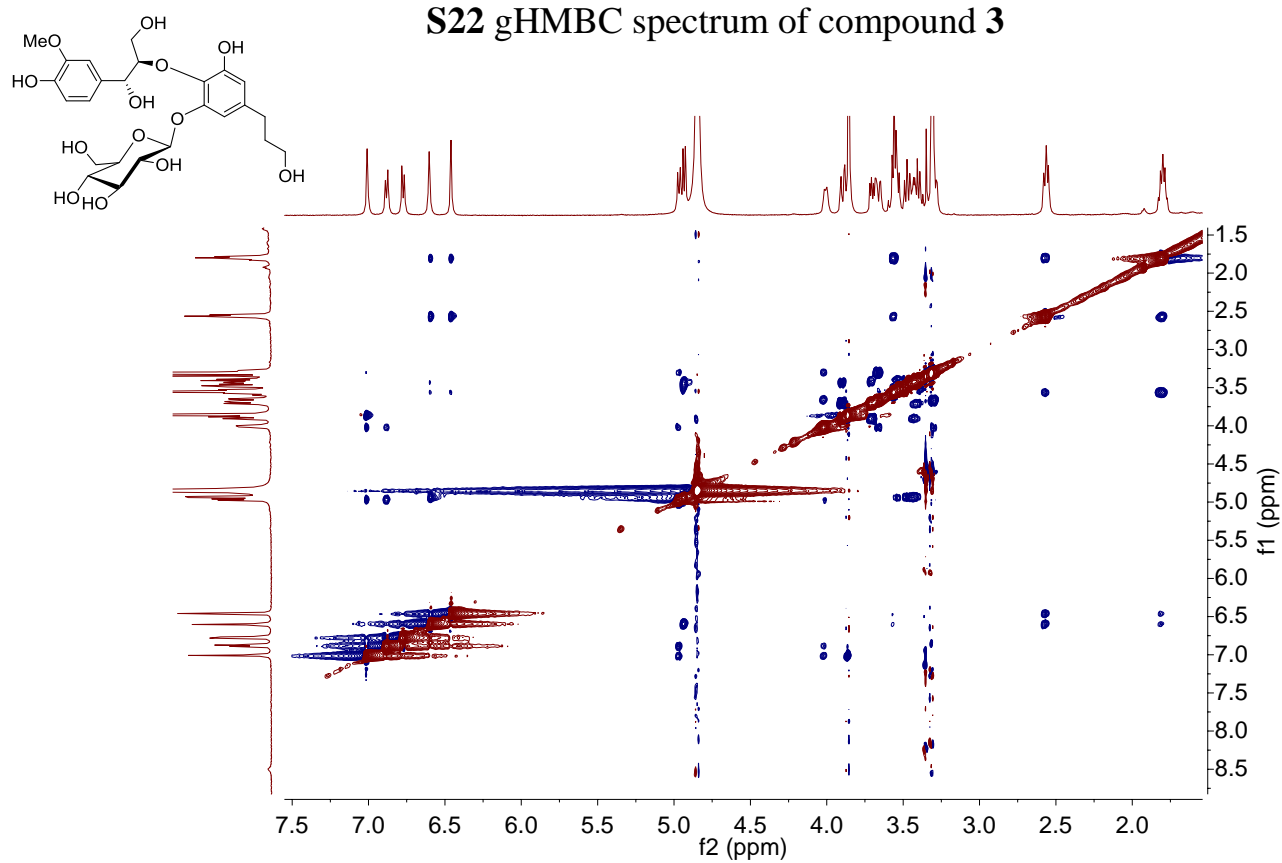

S23 NOESY spectrum of compound 3

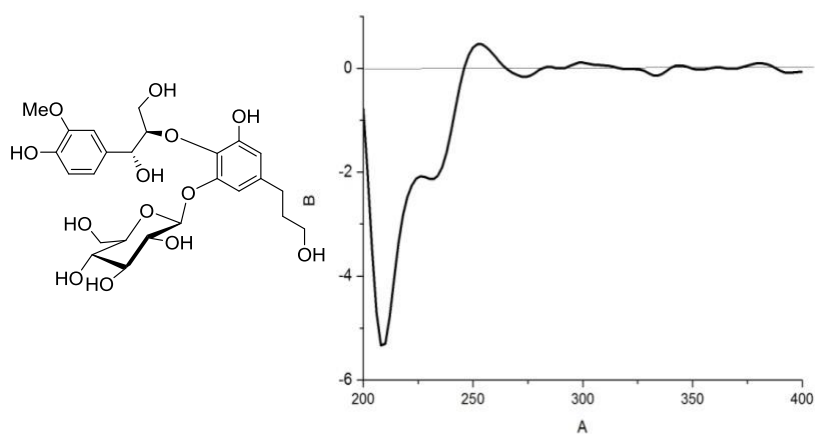

**S24 CD spectrum of compound 3**

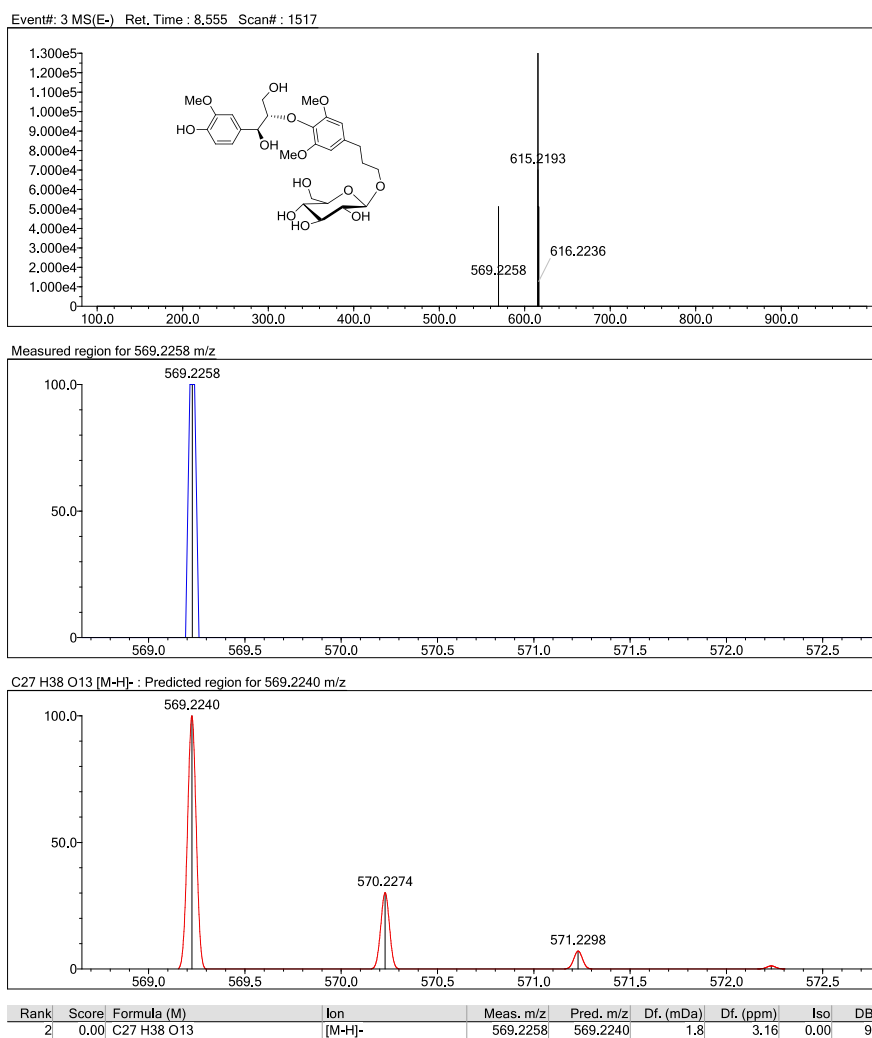

**S25 HRESIMS spectrum of compound 4**

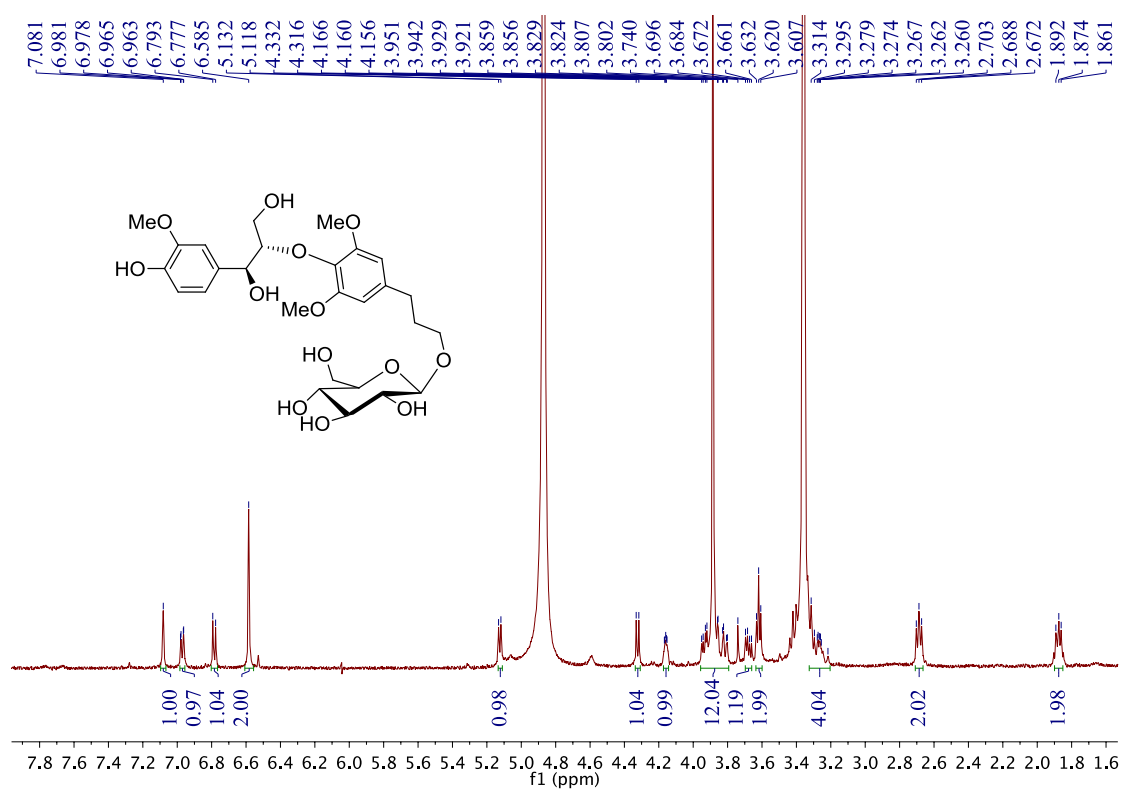

**S26 <sup>1</sup>H NMR spectrum of compound 4**

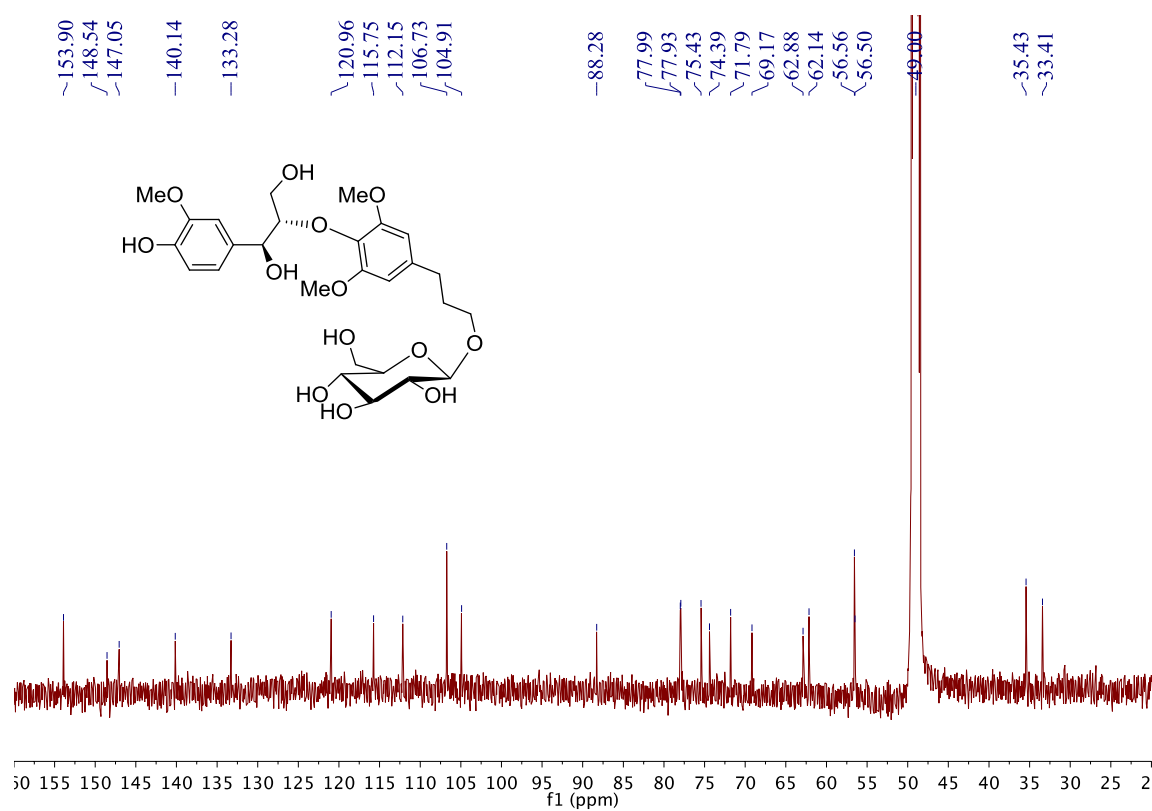

**S27 <sup>13</sup>C NMR spectrum of compound 4**



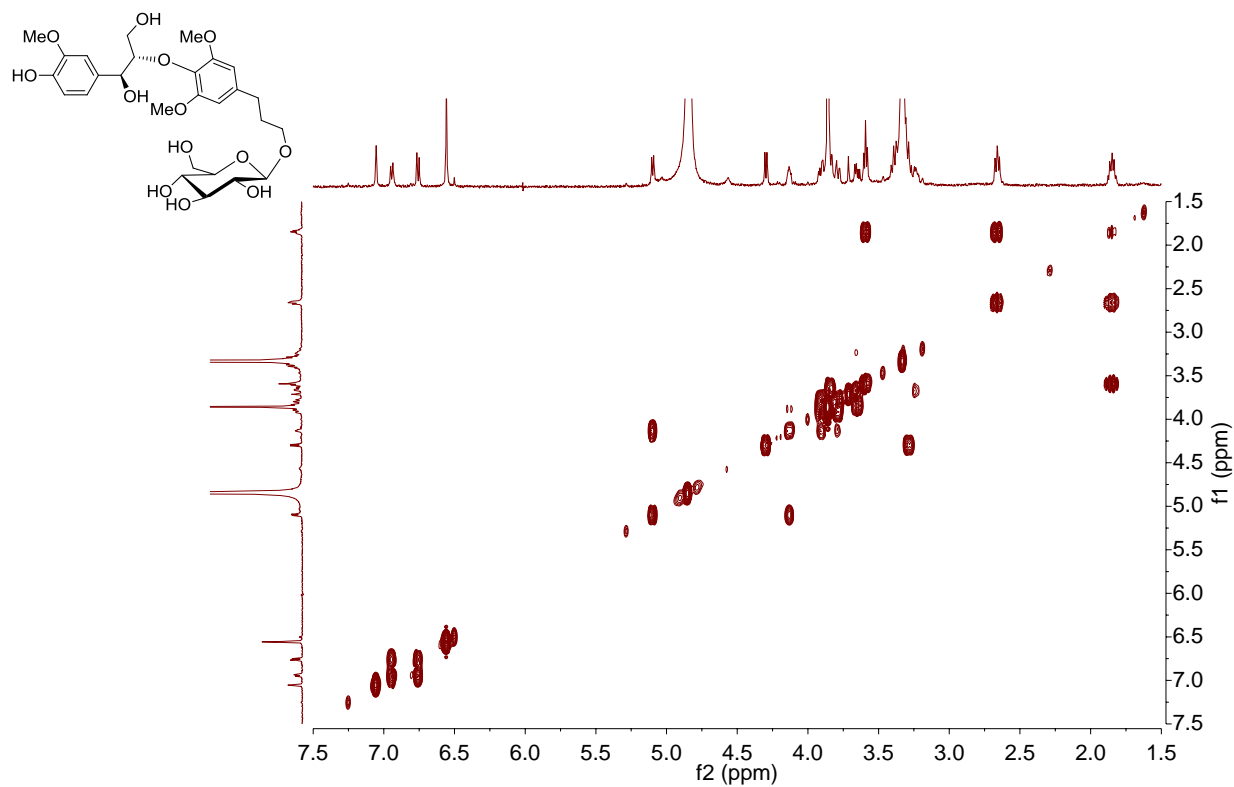

**S28  $^1\text{H}$ - $^1\text{H}$  COSY spectrum of compound 4**

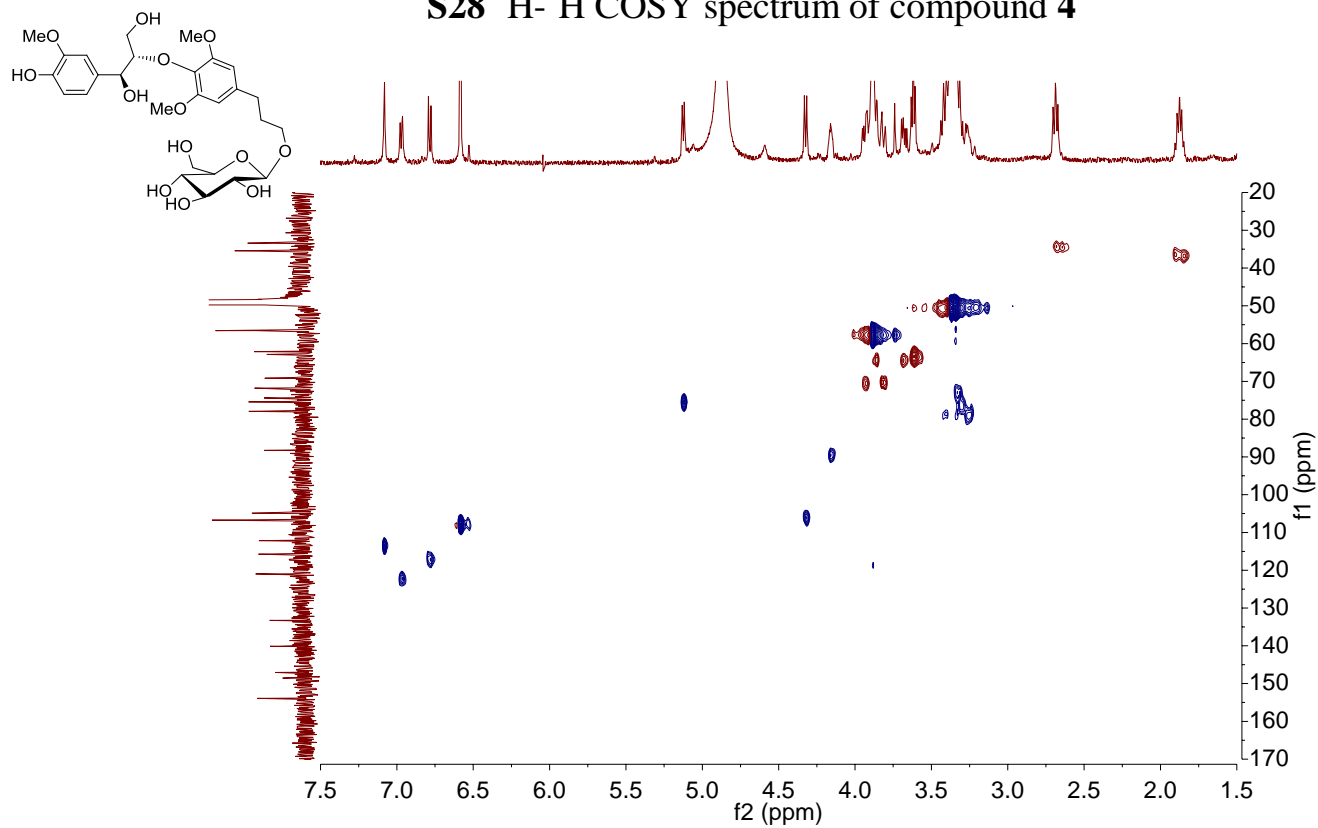

**S29 gHSQC spectrum of compound 4**

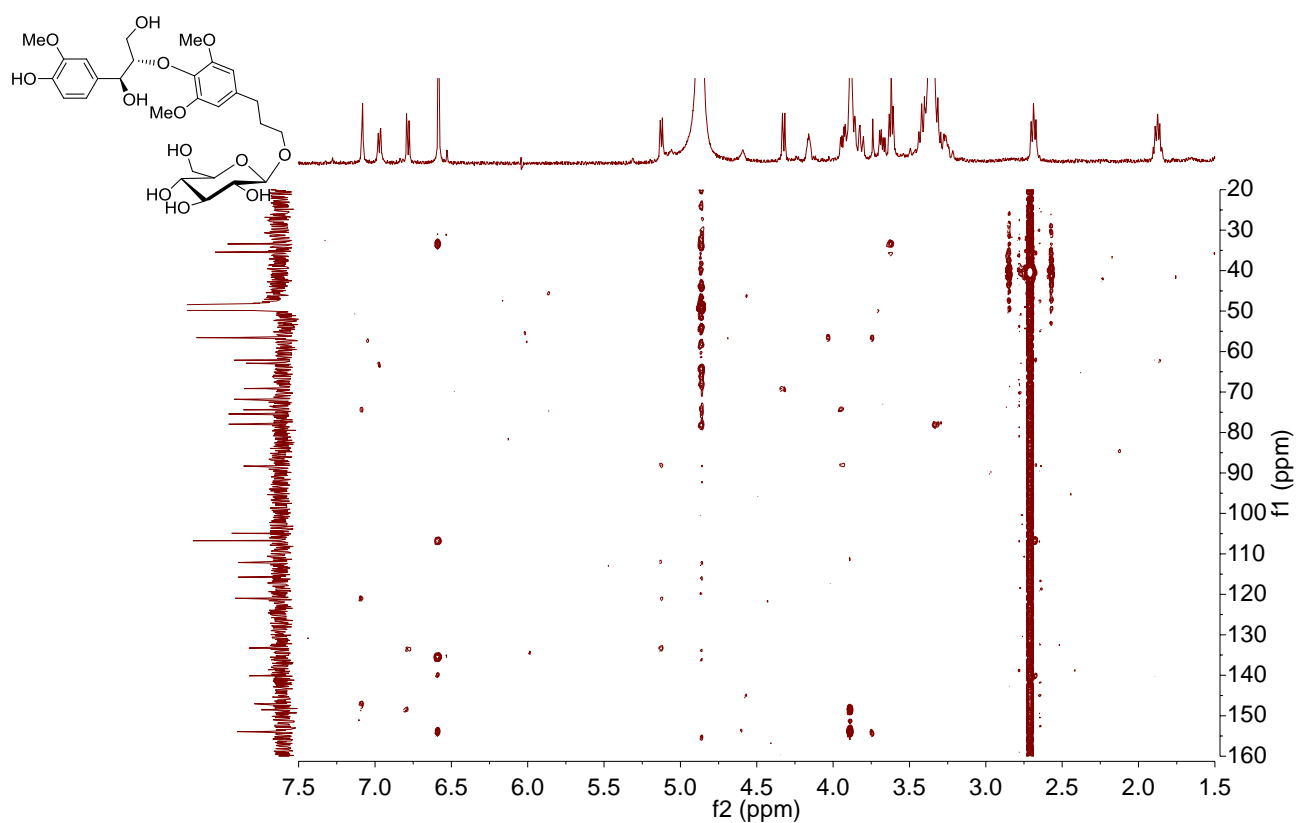

**S30** gHMBC spectrum of compound **4**

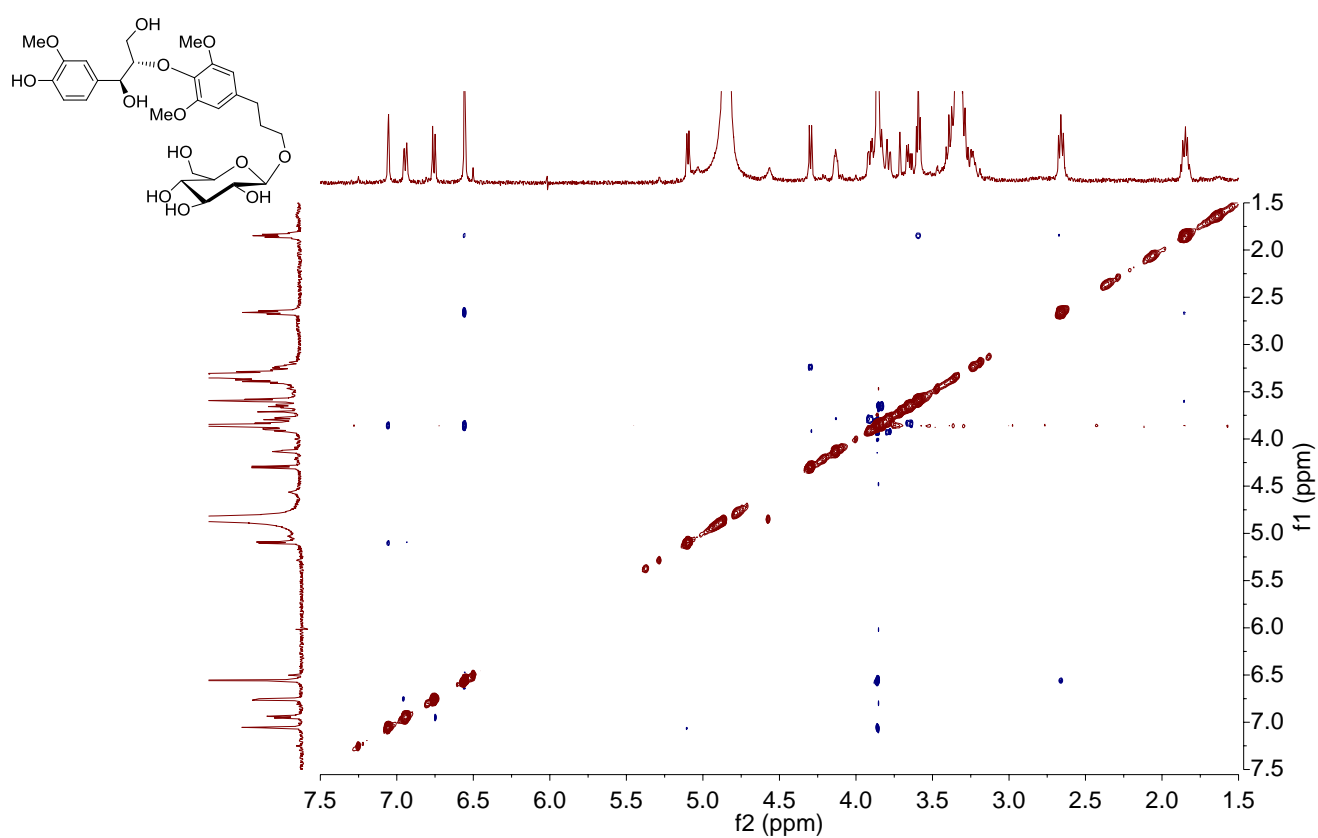

**S31** NOESY spectrum of compound **4**

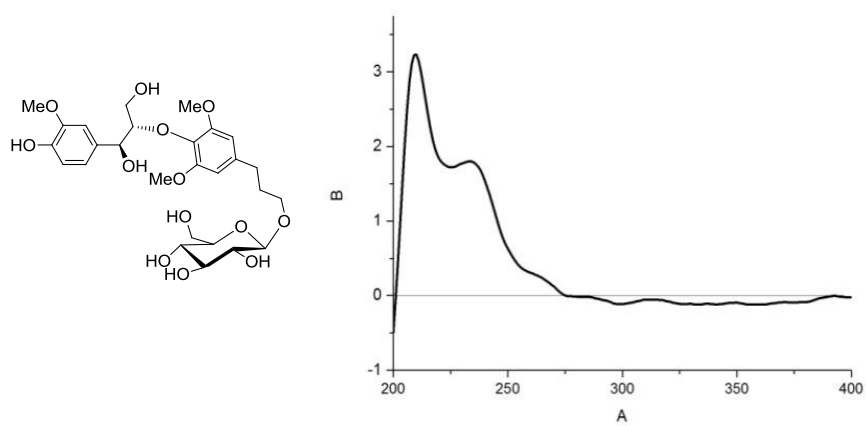

**S32** CD spectrum of compound **4**
